# Supplementary material for: Nanoscale vesicles assembled from non-planar cyclic molecules for efficient cell penetration
Source: Royal Society of Chemistry journal article supplement (doi:10.1039/c9bm00347a), 2019-01-01
Supplement: c9bm00347a1.pdf [file c9bm00347a1.pdf]

*Supporting Information for*

**Nanoscale Vesicles Assembled from Non-Planar Cyclic Molecules for  
Efficient Cell Penetration**

Huang Tang<sup>a</sup>, Zhewei Gu<sup>a</sup>, Cheng Li<sup>a</sup>, Zhibo Li<sup>b</sup>, Wei Wu<sup>a</sup>, Xiqun Jiang<sup>\*a</sup>

<sup>a</sup> *MOE Key Laboratory of High Performance Polymer Materials and Technology, and  
Department of Polymer Science & Engineering, College of Chemistry & Chemical  
Engineering, Nanjing University, Nanjing, 210093, China.*

<sup>b</sup> *School of Polymer Science and Engineering, Qingdao University of Science and  
Technology, Qingdao, China.*

## Instrumentation

High resolution mass spectrometry (HR-MS) analyses were carried out using MALDI-TOF-MS techniques. The matrix used for MALDI was a solution of 10 mg/ml of 7,7,8,8-tetracyanquinodimethane in THF with 1% silver trifluoroacetate as a promoter. Mass spectrometry of CPP and CPP derivatives could also be obtained without matrix.  $^1\text{H}$  NMR spectra and  $^{13}\text{C}$  NMR spectra were recorded at 300 MHz on a Bruker DXP-300 or at 400 MHz on a Bruker DQX-400. Chemical shifts for  $^1\text{H}$  NMR are shown in parts per million (ppm) relative to  $\text{CDCl}_3$  ( $\delta$  7.26 ppm). Chemical shifts for  $^{13}\text{C}$  NMR are expressed in ppm relative to  $\text{CDCl}_3$  ( $\delta$  77.0 ppm). UV absorption spectra were recorded on a Shimadzu UV-2401 spectrophotometer. Fluorescence emission and excitation spectra were measured on a Horiba FluoroMax-4 spectrofluorometer. Cryogenic transmission electronmicroscopy (cryo-TEM) images were captured on FEI T20 electron microscope. Transmission electron microscopy (TEM) images were captured on a JEM-1011 electron microscope. Hydrodynamic diameter was measured by dynamic light scattering (DLS) using a Brookhaven Nano brook omni with a He-Ne laser ( $\lambda = 633$  nm) as the incident beam. Laser scanning confocal images were collected on LSM-710 (Zeiss Inc., Germany).

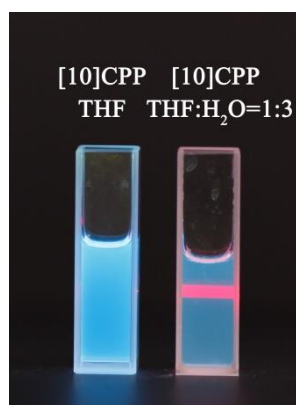

**Fig S1.** Digital photographs of [10]CPP assemblies in THF and THF/ $\text{H}_2\text{O}$  mixed solvent. Each sample was irradiated with 365 nm light from the front and red laser on the right side. Tyndall effect of CPP in THF/ $\text{H}_2\text{O}$  mixed solution can be observed.

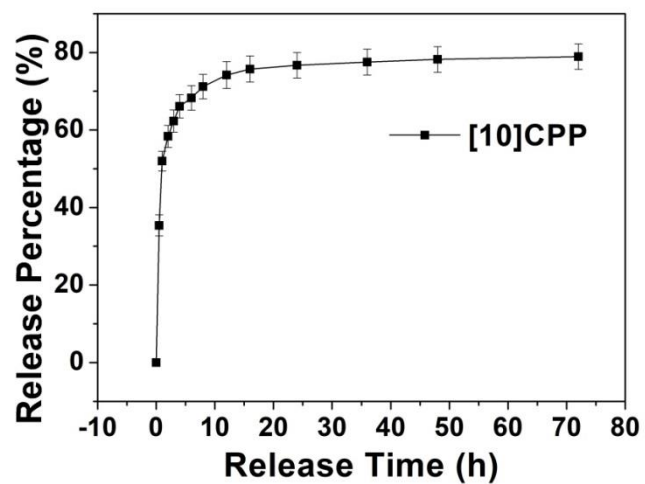

**Fig S2.** In vitro release profiles of Rhodamine B-loaded [10]CPP vesicles in THF/H<sub>2</sub>O=1/3 solution.

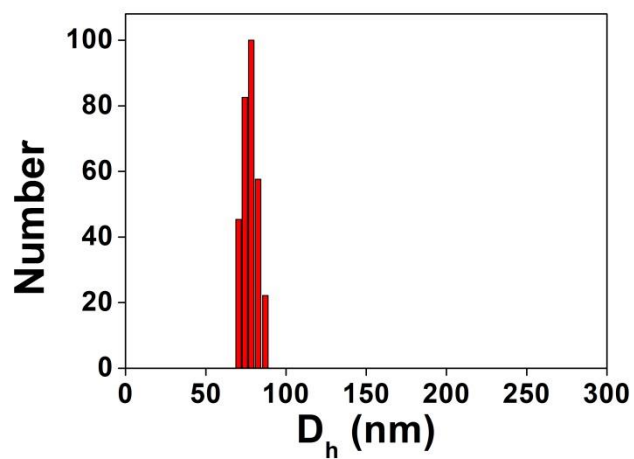

**Fig S3.** Size distribution of [10]CPP at the concentration of  $1 \times 10^{-5}$  M in DMSO/PBS (pH 7.4, 1/99, v/v) at the temperature of 37 °C.

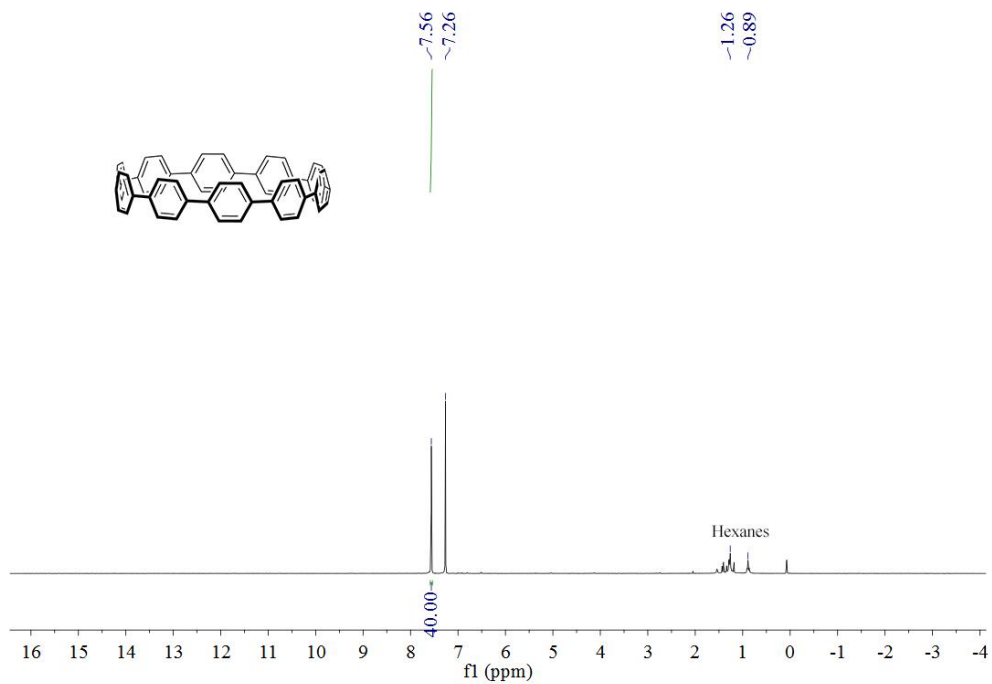

**Fig S4.**  $^1\text{H}$  NMR spectra of [10]CPP.

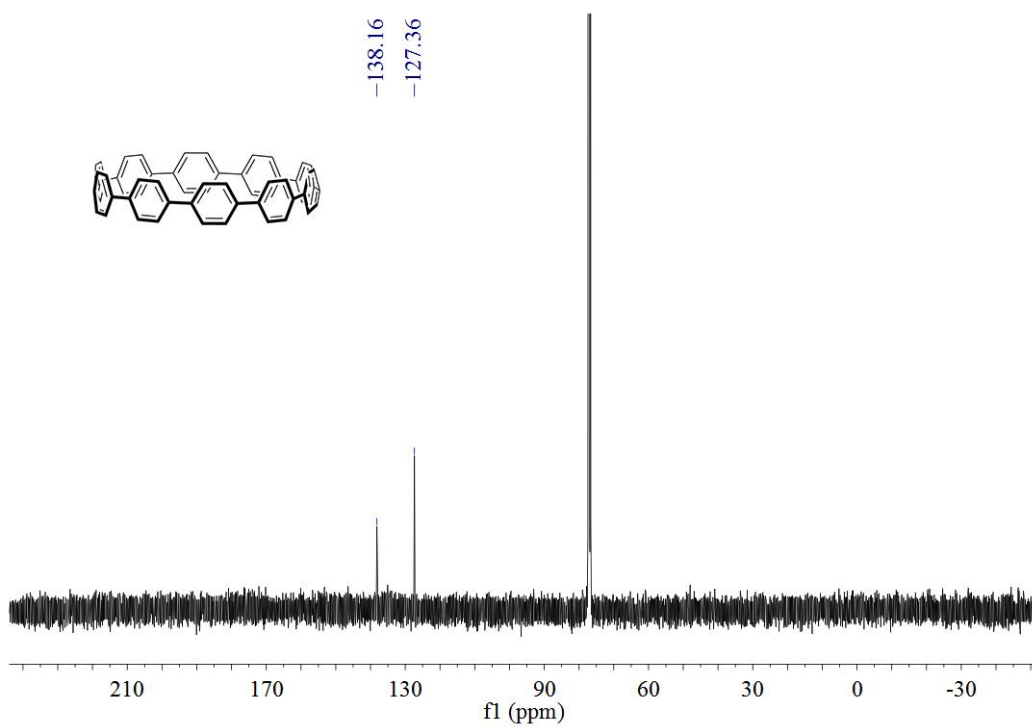

**Fig S5.**  $^{13}\text{C}$  NMR spectra of [10]CPP.

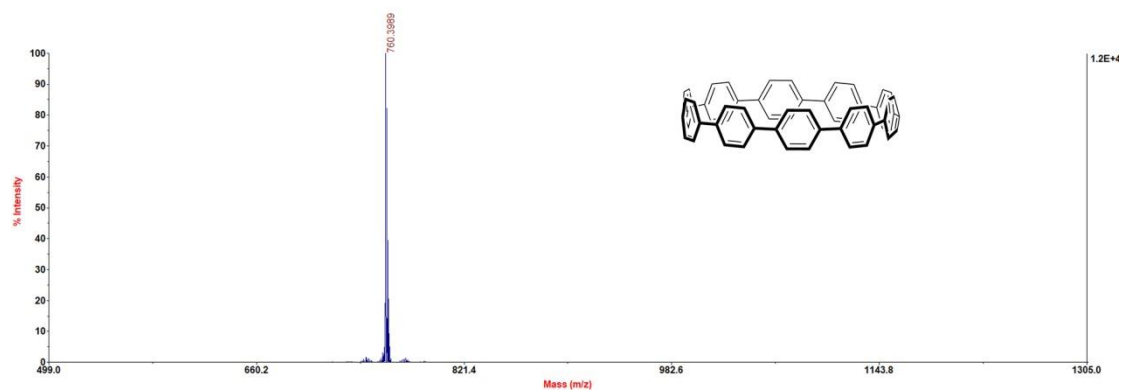

**Fig S6.** MALDI-TOF spectra of [10]CPP.
